# Supplementary material
Source: Springer Nature journal article supplement (https://www.springermedizin.de/resource/supplementary/13054_2013_2191_MOESM6_ESM.pdf/9712638)

Supplemental Fig. 4

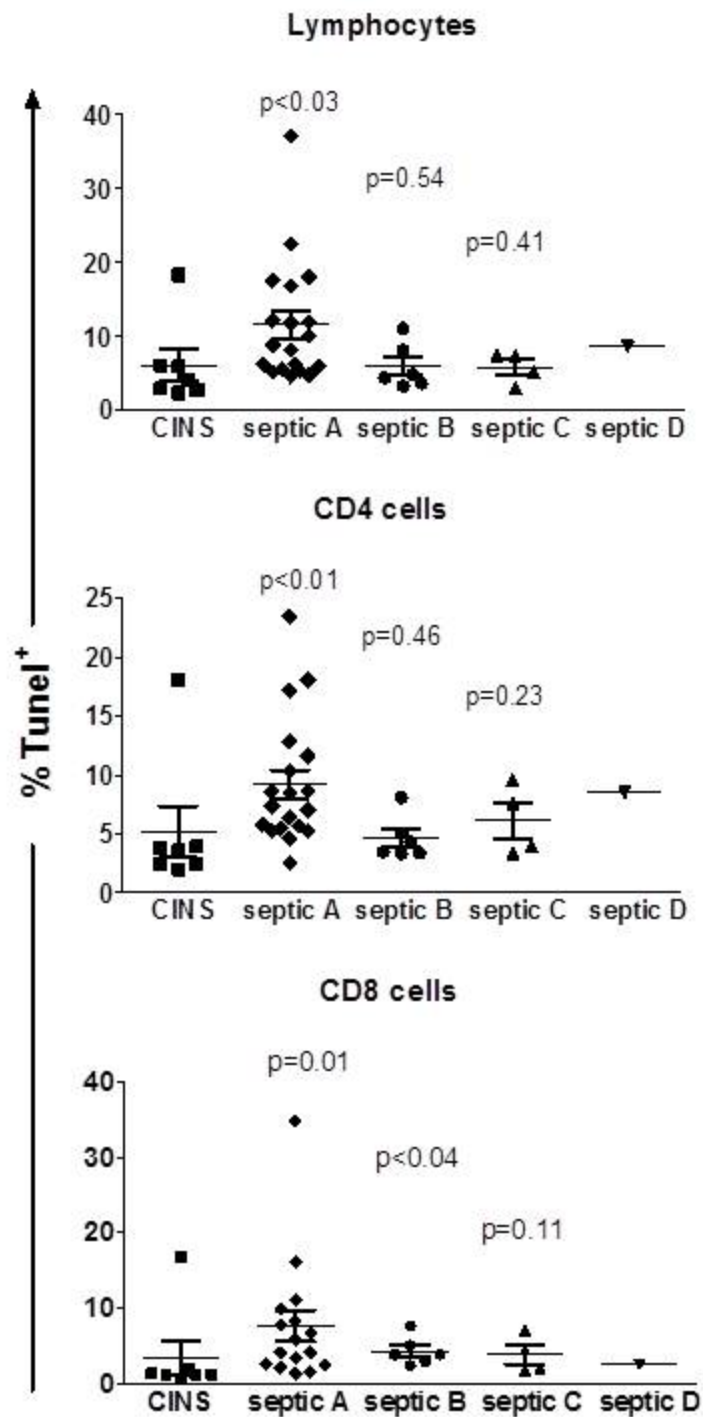

Supplement: MOESM6 [file 9712638]
